# Supplementary material
Source: PubMed Central journal article supplement (PMC7054085)
Supplement: AEM.02780-19-s0001.pdf [file AEM.02780-19-s0001.pdf]

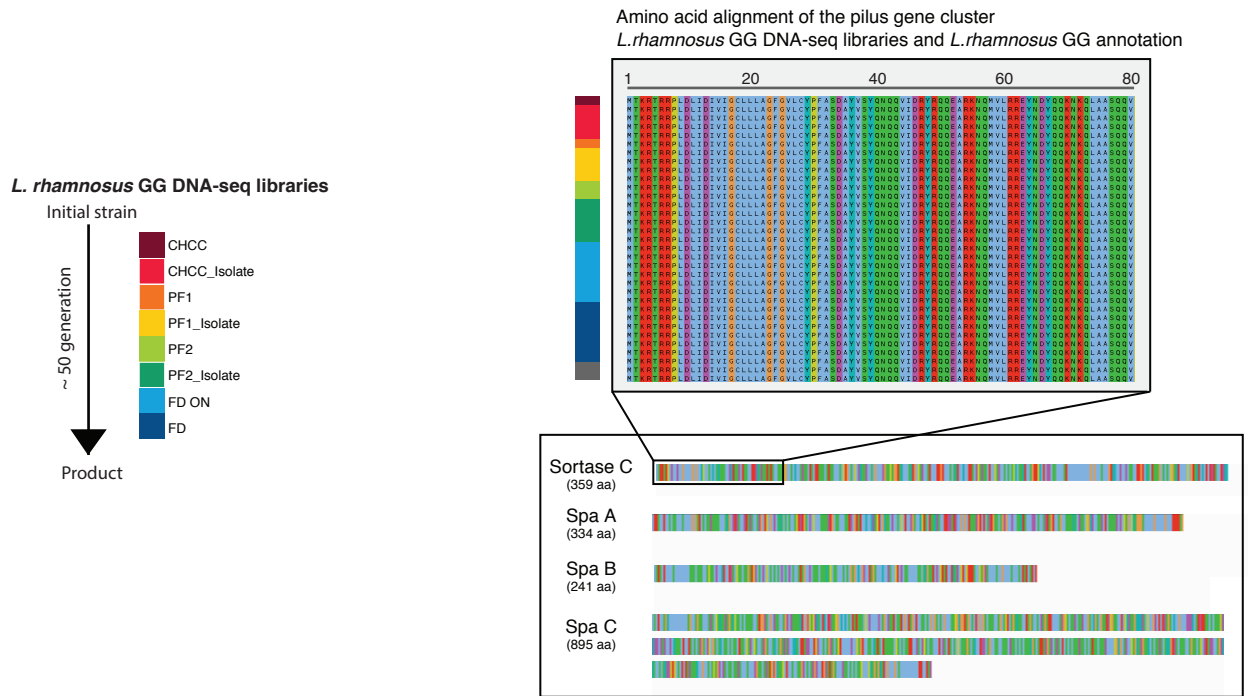

**Figure S1:**

Multiple sequence alignment of amino acids derived from genomic sequences from all samples in Figure 1 for genes in the spaCBA-srtC1 cluster. Top alignment shows a representative zoom-in (from the Sortase C gene) of the multiple alignment, colored by amino acid. Whole gene alignments are shown for each gene as small version of the zoom-in. All samples are identical for all genes. Sample colored as in Figure 1.

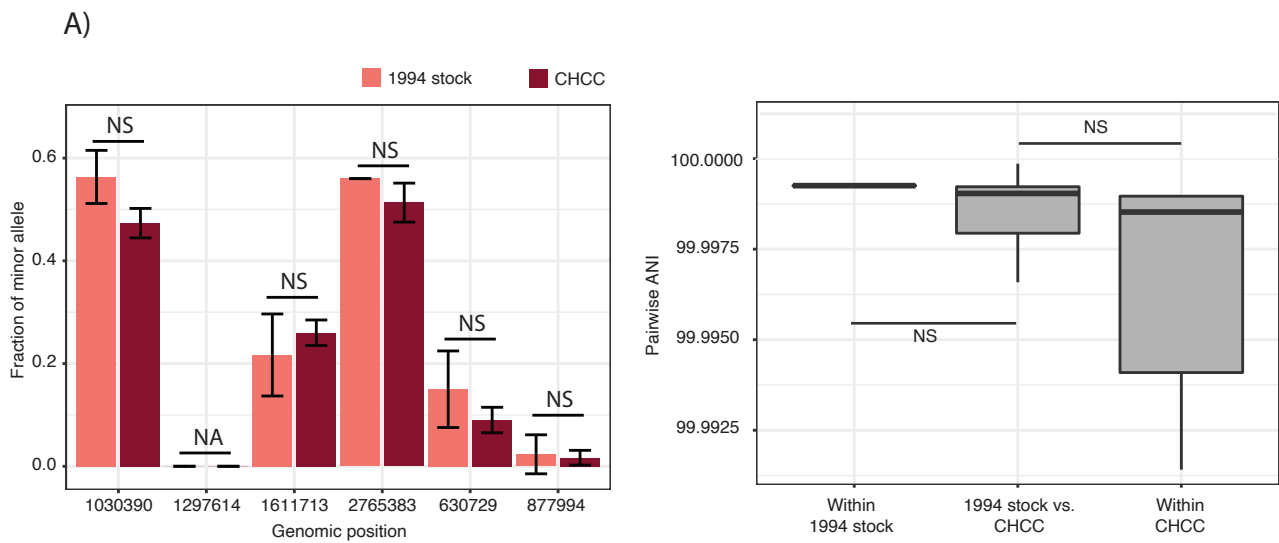

B)

| Genomic Position | Amino Acid Position | Reference Codon or Nucleotide | Mutated Codon or Nucleotide | Reference Amino Acid | Mutated Amino Acid | Refseq Gene ID | Gene Product                                               | Amino Acid Substitution Consequence |
|------------------|---------------------|-------------------------------|-----------------------------|----------------------|--------------------|----------------|------------------------------------------------------------|-------------------------------------|
| 1030390          | 308                 | CAT                           | CAG                         | Histidine            | Glutamine          | WP_003564468.1 | CamS family sex pheromone protein                          | Neutral                             |
| 1297614          | 27                  | ACG                           | ATG                         | Threonine            | Methionine         | WP_005715754.1 | 5'-methylthioadenosine/S-adenosylhomocysteine nucleosidase | Neutral                             |
| 1611713          | 1827                | CAG                           | CGG                         | Glutamine            | Arginine           | WP_014569703.1 | Peptidase                                                  | Neutral                             |
| 2765383          | 249                 | CAC                           | TAC                         | Histidine            | Tyrosine           | WP_014571681.1 | 6-phospho-alpha-glucosidase                                | Neutral                             |
| 630729           | 227                 | CAG                           | CTG                         | Glutamine            | Methionine         | WP_014571154.1 | Hypothetical protein                                       | Neutral                             |
| 877994           | 347                 | TAG                           | TAA                         | Stop codons          | Stop codons        | WP_014569342.1 | Hypothetical protein                                       | Unchanged Stop Codon                |

**Figure S2:**

**A) Fraction of read support in the CHCC stock compared to the original stock from 1994, for the SNPs identified in Figure 4A.**

Left panel: Y axis shows the fraction of reads supporting the alternative allele. Bars represent mean +/- 95% confidence intervals for the three samples of the original stock from 1994 and the three samples of CHCC from the same batch. NS (not significant) indicates  $P > 0.05$  (two-sided Mann-Whitney test) while NA (not applicable) means  $P$  was not possible to calculate (zero fraction in all samples in both groups).

Right panel: Analysis of genome-wide similarity of the three samples of the original stock from 1994 and the three samples of CHCC from the same batch. Y axis shows the distribution of pairwise average nucleotide identity (ANI) scores for a given set of samples as boxplots (within the original stock from 1994, within the CHCC samples from the same batch, and between the two groups). NS (not significant) indicates  $P > 0.05$  (two-sided Mann-Whitney test).

**B) Amino acid substitution consequence prediction of the SNPs identified in Figure 4A.**

Prediction was performed by PROVEAN. Each row shows data for one genomic position.
